1 **Recommendations for tissue homogenisation and extraction in DNA**  
2 **metabarcoding of Malaise trap samples**

3

4 Vera MA Zizka<sup>1\*</sup>, Matthias F Geiger<sup>1</sup>, Thomas Hörrén<sup>2</sup>, Ameli Kirse<sup>1</sup>, Niklas W Noll<sup>1</sup>, Livia Schäffler<sup>1</sup>,  
5 Alice M Scherges<sup>1</sup>, Martin Sorg<sup>2</sup>

6

7 <sup>1</sup> Leibniz Institute for the Analysis of Biodiversity Change (LIB), Zoological Research Museum  
8 Alexander Koenig (ZFMK), Centre for Biodiversity Monitoring and Conservation Science,  
9 Adenauerallee 160, 53113 Bonn, Germany

10 <sup>2</sup> Entomological Society Krefeld (EVK), Marktstraße 159, 47798 Krefeld, Germany

11

12 Keywords: arthropod metabarcoding, biodiversity, monitoring, natura 2000

13

14 \* Corresponding author:

15 Vera MA Zizka

16 Leibniz Institute for the Analysis of Biodiversity Change (LIB), Zoological Research Museum  
17 Alexander Koenig, Adenauerallee 160, 53113 Bonn, Germany

18 Email: [v.zizka@leibniz-zfmk.de](mailto:v.zizka@leibniz-zfmk.de)

19 Phone: +49 (0) 2289122212

20

21

22

23

## 24 Abstract

25 With increased application of DNA metabarcoding in fast and high-resolution biodiversity  
26 assessment, various laboratory protocols have been optimised in recent years and their  
27 further evaluation is subject of current research. Homogenisation of bulk samples and  
28 subsequent DNA extraction from destructed tissue is one way of starting the metabarcoding  
29 process. This essential step in the protocol can either be conducted from wet sample  
30 material (e.g. bulk insect samples) soaked in fixative or from completely dried individuals.  
31 While the latter method appears to produce more consistent results, it is time consuming and  
32 more prone to cross-contamination. We tested both homogenisation approaches with regard  
33 to time efficiency and biodiversity assessment of complex arthropod bulk samples, in  
34 particular how the amount of processed tissue affects taxon recovery. Both approaches  
35 reveal similar taxa compositions and detect a similar total OTU diversity in a single extraction  
36 reaction. Increased amounts of tissue used in DNA extraction improved OTU diversity  
37 detection and recovered particularly specific low-biomass taxa, making this approach  
38 valuable for samples with high biomass and/or diversity. Due to less handling time and lower  
39 vulnerability for cross-contamination we recommend the processing of wet material when  
40 sample homogenisation is applied.

41

## 42 Introduction

43 For highly diverse groups as terrestrial arthropods and insects in particular, where  
44 morphological identification is difficult, slow and expensive, metabarcoding provides an  
45 efficient alternative (Bush et al., 2019; Evans et al., 2016; Morinière et al., 2019; van der  
46 Heyde et al., 2020; Yu et al., 2012). In recent years, a variety of studies evaluated and  
47 discussed promising sampling strategies (Gleason et al., 2020; Marquina et al., 2019;  
48 Pereira-da-Conceicao et al., 2020; Steinke et al., 2020), laboratory procedures (Elbrecht et  
49 al., 2019; Majaneva et al., 2018; Piñol et al., 2019; Zizka et al., 2019), bioinformatic analyses  
50 (Boyer et al., 2016; Frøslev et al., 2017; Porter and Hajibabaei, 2020; Turon et al., 2020) and  
51 ways of integration into existing biodiversity monitoring matrices (Buchner et al., 2019;  
52 Cordier et al., 2018; Mächler et al., 2020; Pawlowski et al., 2018). This resulted in a variety  
53 of different DNA metabarcoding protocols, whereas standardisation is still lacking even  
54 though it is a major prerequisite for inter-comparability and transferability of methods to  
55 applied concepts (Bush et al., 2019; McGee et al., 2019; Pawlowski et al., 2018).

56

57 Aside from eDNA (environmental DNA) metabarcoding, where free extracellular DNA is  
58 processed (e.g. from soil, water, faeces), DNA can be extracted from enclosed communities

59 (cDNA), more precisely, the sample's fixative ethanol (Batovska et al., 2021; Hajibabaei et  
60 al., 2012; Martins et al., 2019; Zizka et al., 2019) or propylene glycol (Martoni et al., 2021),  
61 from added lysis buffer (Giebner et al., 2020; Ji et al., 2013; Kirse et al., 2021) or from  
62 homogenised tissue of specimens (Hardulak et al., 2020; Mata et al., 2020; Zizka et al.,  
63 2020). While the latter approach is currently considered most effective to assess biodiversity  
64 pattern (Hardulak et al., 2020; Marquina et al., 2019; Persaud et al., 2021; Zenker et al.,  
65 2020; Zizka et al., 2019) it prevents subsequent morphological determinations (Nielsen et  
66 al., 2019). Homogenisation and tissue-based DNA extraction can be conducted from wet  
67 (Beentjes et al., 2019; Gibson et al., 2015; Porter et al., 2019) samples in ethanol or from  
68 dried tissue after ethanol evaporation (Elbrecht et al., 2019; Hardulak et al., 2020;  
69 Hausmann et al., 2020; Steinke et al., 2020). While powder homogenate of dried samples  
70 usually appears finer than that of wet material, handling is more prone to cross  
71 contamination and time consuming. Since most DNA extraction approaches tolerate only a  
72 limited amount of tissue per reaction, only a subsample of complete material is usually  
73 processed, ranging between 1-100 mg (Elbrecht et al., 2017; Hausmann et al., 2020;  
74 Majaneva et al., 2018; Marquina et al., 2019; Mata et al., 2020). Higher tissue volume during  
75 DNA extraction requires multiple reactions or more voluminous DNA extraction kits and is  
76 increases effort and material costs. However, DNA extraction from the subsample tissue  
77 assumes perfect homogenisation and equal distribution within storage tubes, and it remains  
78 uncertain to what extent variations in tissue composition affects the assessment of species  
79 contained in bulk samples. Insight on that question is essential to decide on how to optimise  
80 diversity detection and is thus a prerequisite for successful and reliable application of tissue-  
81 based DNA metabarcoding. While Buchner et al. 2021 analyse the overlap in detected taxa  
82 between subsamples only for wet homogenisation of Malaise traps, other studies cover  
83 aquatic samples or other trapping types with lower biomass and diversity (Beentjes et al.,  
84 2019; Elbrecht et al., 2017; Mata et al., 2020). In addition, if several subsamples are applied,  
85 taxa detection is not compared amongst them or further methodological investigations are  
86 applied (e.g. comparison of different extraction methods (Majaneva et al., 2018). The overlap  
87 between subsamples of homogenised tissue or increases in taxon recovery by use of larger  
88 quantities of homogenised tissue in Malaise trap metabarcoding has never been tested  
89 systematically but bears important information for high resolution metabarcoding of terrestrial  
90 insect biodiversity.

91  
92

93 Here we use five time-interval Malaise trap samples collected in a protected area in  
94 Germany and investigate the effect of homogenisation strategy and tissue subsampling on  
95 biodiversity assessments. Based on our results, we formulate best-practice

96 recommendations for tissue-based DNA metabarcoding protocols esp. for Malaise trap  
97 samples, which ensure time and money efficiency, best quality of biodiversity assessment  
98 and also improved standardisation of DNA metabarcoding for biodiversity monitoring  
99 programs.

100

101

## 102 Material and Methods

### 103 Sampling

104 Samples were collected in the Nature reserve 'Latumer Bruch' near Krefeld in Western  
105 Germany. All samples originate from one Malaise trap (51.326701N, 6.632973E). Detailed  
106 information about samples taken between May and July are given in Table 1.

107

108 **Tab. 1:** Malaise trap samples analysed: duration: time collection bottle was installed on the Malaise  
109 trap, wet biomass: complete wet biomass (g) and biomass per day (g/day) over sampling interval

| ID  | duration         | wet biomass (g) | wet biomass (g/day) |
|-----|------------------|-----------------|---------------------|
| T 1 | 12.05 - 18.05.19 | 14.1            | 2.4                 |
| T 2 | 29.05 - 08.06.19 | 65.9            | 6.7                 |
| T 3 | 28.06 - 07.07.19 | 71.7            | 8                   |
| T 4 | 07.07 - 18.07.19 | 40              | 3.6                 |
| T 5 | 18.07 - 28.07.19 | 70.1            | 7                   |

110

111 Malaise trap sampling was conducted in a standardised manner (for details see Ssymank et  
112 al., 2018). Samples were collected in 96% denatured ethanol (1% MEK). After collection,  
113 ethanol was replaced with new 96% undenatured ethanol and stored at -20°C for further  
114 processing.

115

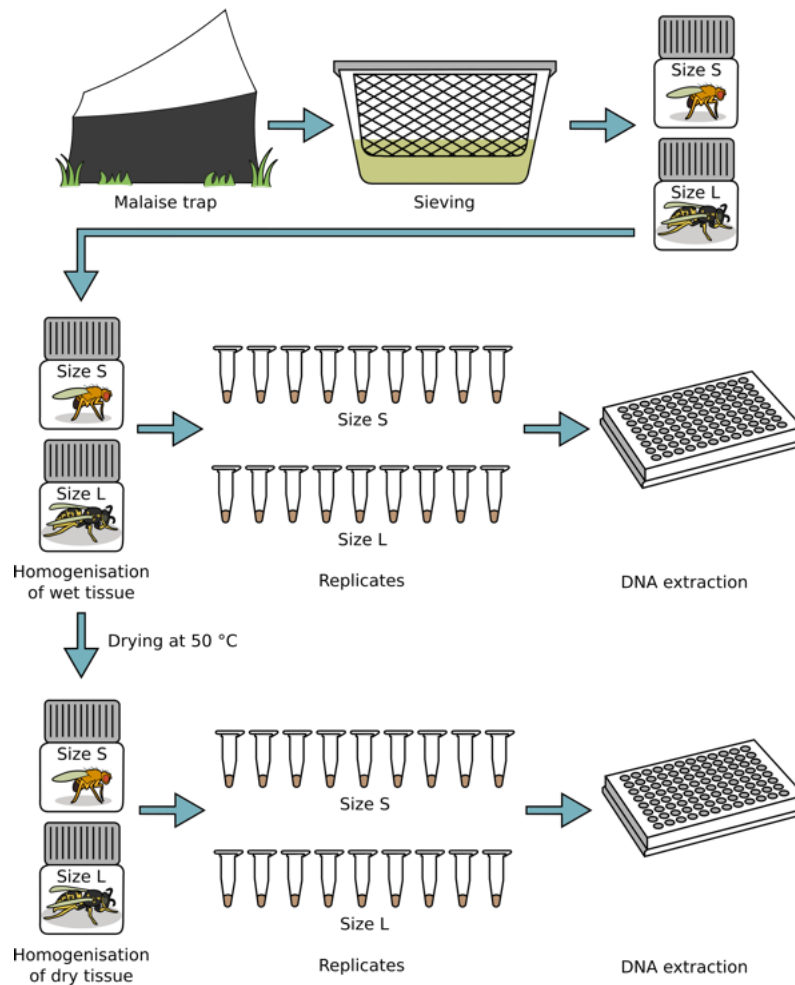

116

117 **Figure 1:** Experimental setup. Malaise trap samples were sieved in ethanol and separated into size  
118 fraction **Large** (>4mm) and **Small** (<4mm). Wet tissue was homogenised and nine subsamples per  
119 size fraction with ~20 mg each were transferred to 1.5 µl Eppendorf tubes for separate DNA  
120 extraction. Homogenised tissue was dried and again homogenised in dry conditions. Again, nine  
121 subsamples per size fraction with ~20 mg each were transferred to 1.5 µl Eppendorf tubes.  
122 Subsequent DNA workflow was conducted as described in Material and Methods.

123

#### 124 Laboratory work

125 Supernatant ethanol was removed and each sample was separated into two size classes by  
126 sieving of wet specimen through a 4 mm x 4 mm mesh with a wire diameter of 0.5 mm  
127 (untreated stainless steel). In the following, the size fractions will be referred to as either S  
128 (small, < 4mm) or L (large, > 4 mm). Depending on sample volume, individuals of both size  
129 classes were transferred to 30 ml tubes (Nalgene, wide-mouth bottle, polypropylene) or to 50  
130 ml Falcon tubes, and approximately 20 g of grinding balls (5 mm diameter, stainless steel,  
131 Retsch GmbH) were added to each sample. Homogenisation of wet samples was conducted  
132 with a mixer mill MM 400 (Retsch GmbH) at a frequency of 30 s<sup>-1</sup> for five minutes. Nine

133 subsamples per sample and size class were transferred to 1.5 ml Eppendorf tubes,  
134 centrifuged for 1 minute at 10,000 rpm (Heraeus Fresco 21 Centrifuge, Thermo Scientific)  
135 and dried overnight in a shaking incubator (ILS6, VWR) at 50 °C (90 samples in total, 5  
136 samples x 2 treatments x 9 subsamples). Subsamples were weighed (20 mg ± 6 mg) on a  
137 fine scale balance (Entris, Sartorius). Together with 6 negative controls (200 µl lysis buffer,  
138 no sample added) and DNA was extracted with the DNeasy 96 Blood and Tissue Kit  
139 (Quiagen, Hilden, Germany) following manufacturer instructions. Remaining sample tissue  
140 (in 30 ml tubes, not transferred to 1.5 Eppendorf tubes) was centrifuged for 1 minute at 4700  
141 rpm (MegaStar 1.6, VWR Collection) and the supernatant discarded afterwards. Remaining  
142 tissue was left to dry in a shaking incubator at 50 °C for up to 3 days until complete ethanol  
143 evaporation. Dried tissue of samples containing less than 30 ml was again homogenised at a  
144 frequency of 30 s/sec for 5 minutes with the Retsch mixer mill (MM400). Samples consisting  
145 of more than 30 ml source material were homogenised for 3 minutes with a Turax mixer mill  
146 (Tube Mill 100 Control) at 25,000 rpm because dried material was clustered to a hard unit  
147 and could not be destructed with the former mill. Nine subsamples per sample were  
148 transferred to 1.5 Eppendorf tubes and weighed (23 mg ± 5 mg). To ensure processing of  
149 identical samples during this experiment, samples already homogenised under wet condition  
150 were dried and homogenised again under dry condition. Obviously, this includes an  
151 additional homogenisation step for those samples, which likely influences fineness of  
152 material. This will be picked up in the discussion. For simplicity, the former approach will  
153 hereinafter will be referred to as *wet homogenisation*, while the latter approach (wet with  
154 additional dry homogenisation) will be referred to as *dry homogenisation*. Together with 6  
155 negative controls DNA was extracted with the DNeasy 96 Blood and Tissue Kit (Quiagen,  
156 Hilden, Germany) following manufacturer instructions for both plates. Extraction success and  
157 DNA quality was checked on a 1 % agarose gel.

158

159 A two-step PCR protocol was applied using standard Illumina Nextera primers for dual  
160 indexing of samples. The first PCR was performed with the PCR Multiplex Plus Kit (Qiagen,  
161 Hilden, Germany) using 12.5 µl master mix, 1 µl of DNA template, 0.2 µM of the fwhF2  
162 forward (Vamos et al., 2017) and Fol\_degen\_rev reverse (Yu et al., 2012) primers  
163 respectively. The primer pair targets a 313 bp long stretch of the COI DNA barcode region  
164 and was positively evaluated in a comparison on Malaise trap samples (Elbrecht et al.,  
165 2019). The PCR mix was filled up with 10.5 µl ddH<sub>2</sub>O to a 25 µl reaction volume. The  
166 following PCR program was applied: initial denaturation at 95 °C for 5 min; 25 cycles of: 30 s  
167 at 95 °C, 30 s at 50 °C and 50 s at 72 °C; final extension of 5 min at 72 °C. First step PCR  
168 (PCR 1) product was used for the second PCR (PCR 2), also conducted with the PCR  
169 Multiplex Plus Kit (Qiagen, Hilden, Germany). Reaction included 1 µl DNA template from

170 PCR 1, 0.2  $\mu$ M of each tagging primer (Nextera, Illumina, San Diego, USA) and 12.5  $\mu$ l  
171 master mix filled up with 10.5  $\mu$ l H<sub>2</sub>O. Primers included a nucleotide overhang as a binding  
172 site for primers in PCR 2, which was run with the same program as PCR 1 but with only 15  
173 cycles. PCR success was evaluated on a 1 % agarose gel before PCR products were  
174 normalised using a SequalPrep Normalisation plate (Thermo Fisher Scientific, MA, USA)  
175 following the manufacturer's instructions with an end concentration of 25 ng per sample (100  
176  $\mu$ l). Of each sample 10  $\mu$ l was pooled together and a left sided size selection was applied  
177 twice on the sample pool to remove primer residuals (ration 0.76x, SPRIselect Beckman  
178 Coulter). Library concentration was measured with a Quantus fluorometer (Promega,  
179 Madison, USA) and on a fragment analyser (Agilent Technologies, Santa Clara, CA, USA)  
180 and the pool was sent for sequencing on two Miseq runs (2 x 300 bp) to Macrogen Europe  
181 B.V., Netherlands.

182

### 183 Data analysis

184 The quality of sequences delivered by Macrogen was determined through the program  
185 Fastqc (Andrews et al., 2012). Subsequent data processing was conducted for all samples  
186 as implemented in JAMP v0.67 (<https://github.com/VascoElbrecht/JAMP>) using standard  
187 settings. Paired-end reads were merged (Edgar and Flyvbjerg, 2015) (module Merge\_PE)  
188 with vsearch v2.15.0 (Rognes et al., 2016). Cutadapt 3.4 (Martin, 2017) was used to remove  
189 primers and to discard sequences of unexpected length so that only reads with a length of  
190 303 - 323 bp were used for further analyses. The module Max\_ee was used to discard all  
191 reads with an expected error >0.5 (Edgar and Flyvbjerg, 2015). Sequences were  
192 dereplicated, singletons were removed and sequences with  $\geq 97\%$  similarity were clustered  
193 into Operational Taxonomic Units (OTUs) using uparse (Cluster\_otus) (Edgar, 2013). OTUs  
194 with a minimal read abundance of 0.003% per sample were retained for further analysis and  
195 the program LULU was used for further qualitative filtering (Frøslev et al., 2017). Taxonomic  
196 assignment of molecular units was conducted by comparison with an Arthropoda reference  
197 database. The database was created by taxalogue (<https://github.com/nwnoll/taxalogue>  
198 [commit: 62ce71819af40a6e605e9142f0ccd69318477596](https://github.com/nwnoll/taxalogue/commit/62ce71819af40a6e605e9142f0ccd69318477596)) with sequences from BOLD  
199 (<https://www.boldsystems.org>), NCBI GenBank (<https://www.ncbi.nlm.nih.gov/genbank/>) and  
200 GBOL (<https://bolgermany.de/gbol1/ergebnisse/results>). Taxon names were normalised  
201 according to the NCBI Taxonomy (<https://www.ncbi.nlm.nih.gov/taxonomy>). Only those  
202 OTUs were kept that had at least 85% similarity with a sequence in a reference database  
203 (using vsearch version 2.14.1 (Rognes et al., 2016) with `-usearch_global` command (Edgar,  
204 2010) and the following parameters: `-id 0.85, -dbmask none, -qmask none, -maxhits 1000,`  
205 `blast6out` and `-maxaccepts 0`). Custom scripts were used to extract the best hits and assign

206 each OTU a taxonomic name. For analysis of significant differences in OTU numbers  
 207 between homogenisation methods and size fractions, a Kruskal-Wallis test was performed  
 208 as integrated in the R package “dplyr” (Wickham et al., 2021). Dissimilarity indices were  
 209 calculated with the package “vegan” (Oksanen et al., 2019). For species accumulation  
 210 curves and associated calculations of extrapolated values the package “iNEXT” (Hsieh et al.,  
 211 2016) was used. Figures were constructed with the R package ggplot (Wickham, 2016).

212

## 213 Results

214 On the two Miseq runs 13.3 and 14.7 million reads in forward and reverse direction were  
 215 assigned to the specified index combinations. Raw data are uploaded at GenBank  
 216 (accession number: XX). After quality filtering, on average 114,394 ( $\pm$  20,365) reads were  
 217 kept per sample. For both homogenisation approaches combined and all subsamples, in  
 218 total 1,529 OTUs were clustered with the following order-level assignments: Coleoptera 158  
 219 (10.3%), Diptera 372 (24.3%), Hemiptera 134 (8.8%), Hymenoptera 689 (45.1%),  
 220 Lepidoptera 52 (3.4%), other orders 99 (6.4%), no assignment to order level 25 (1.6%). Of  
 221 those, 1088 OTUs were assigned to genus or species level. Detailed information about OTU  
 222 assignments and read distribution on order level are summarised in Table 1 and Table S1.  
 223 While the highest number of OTUs was assigned on average to dipterans (L: 41.6%, S:  
 224 37.5%) and hymenopterans (L: 38%, S: 32.3%), the main proportion of reads was related to  
 225 dipterans (L: 60.8%, S: 77%) and < 10% to representatives of Hymenoptera (Table 1). This  
 226 was most pronounced for size fraction S, where on average only 4.7% of the reads were  
 227 assigned to this highly diverse order.

228

229 **Table 1:** Average proportion of OTUs and reads assigned per time interval and through all  
 230 samples to the orders Coleoptera, Diptera, Hemiptera, Hymenoptera, Lepidoptera, other  
 231 arthropod orders and OTUs not assigned to order level (see table S1) for both  
 232 homogenization approaches and all subsamples combined

| Order      | Size | OTU number [%]                   | Read number [%]                   | Total OTU number   |
|------------|------|----------------------------------|-----------------------------------|--------------------|
| Coleoptera | L    | 5.7 $\pm$ 1.9                    | 6 $\pm$ 4.9                       | 158 (10.3%)        |
|            | S    | 11.1 $\pm$ 1                     | 5.5 $\pm$ 2.8                     |                    |
| Diptera    | L    | <b>41.6 <math>\pm</math> 9.8</b> | <b>60.8 <math>\pm</math> 13.3</b> | <b>372 (24.4%)</b> |
|            | S    | <b>37.5 <math>\pm</math> 8.8</b> | <b>77 <math>\pm</math> 11.9</b>   |                    |
| Hemiptera  | L    | 3 $\pm$ 0.8                      | 0.4 $\pm$ 0.3                     | 134 (8.8%)         |
|            | S    | 11.2 $\pm$ 2.3                   | 10.1 $\pm$ 10.7                   |                    |



|                  |   |                |                |             |
|------------------|---|----------------|----------------|-------------|
| Hymenoptera      | L | $38 \pm 5.2$   | $18.7 \pm 7.9$ | 689 (45.1%) |
|                  | S | $32.3 \pm 7.5$ | $4.7 \pm 2.5$  |             |
| Lepidoptera      | L | $7.6 \pm 3.2$  | $13.8 \pm 5.4$ | 52 (3.4%)   |
|                  | S | $2.9 \pm 1.3$  | $1.8 \pm 1$    |             |
| Other arthropods | L | $2.8 \pm 0.8$  | $0.3 \pm 0.2$  | 98 (6.4%)   |
|                  | S | $3.6 \pm 0.6$  | $0.2 \pm 0.1$  |             |
| No assignment    | L | $1.2 \pm 0.4$  | $0.1 \pm 0.2$  | 25 (1.64%)  |
|                  | S | $1.3 \pm 0.3$  | $0.7 \pm 0.5$  |             |

233

234

235 While different emptying dates and the different size classes per sample showed distinct  
 236 community compositions (Fig. 2,  $p < 0.002$ ), the condition during homogenisation (only wet  
 237 or wet and additional dry homogenisation) had no effect on sample ordination in NMDS  
 238 analysis ( $p = 0.997$ , Fig. 2). However, average Jaccard dissimilarity between subsamples  
 239 homogenised in wet and additional dry condition ( $0.179 \pm 0.06$ ) was lower ( $p < 0.001$ ) than  
 240 dissimilarities between subsamples homogenised in only wet condition ( $0.207 \pm 0.081$ ) and  
 241 when subsamples of one emptying date and size fraction were compared amongst  
 242 homogenisation approaches ( $0.206 \pm 0.089$ ,  $p < 0.001$ ). Bray-Curtis dissimilarity was on  
 243 average lower within wet and dry ( $0.11 \pm 0.07$ ) compared to only wet ( $0.11 \pm 0.09$ )  
 244 homogenised subsamples than comparing subsamples between methods ( $0.13 \pm 0.08$ ,  $p <$   
 245  $0.01$ ).

246

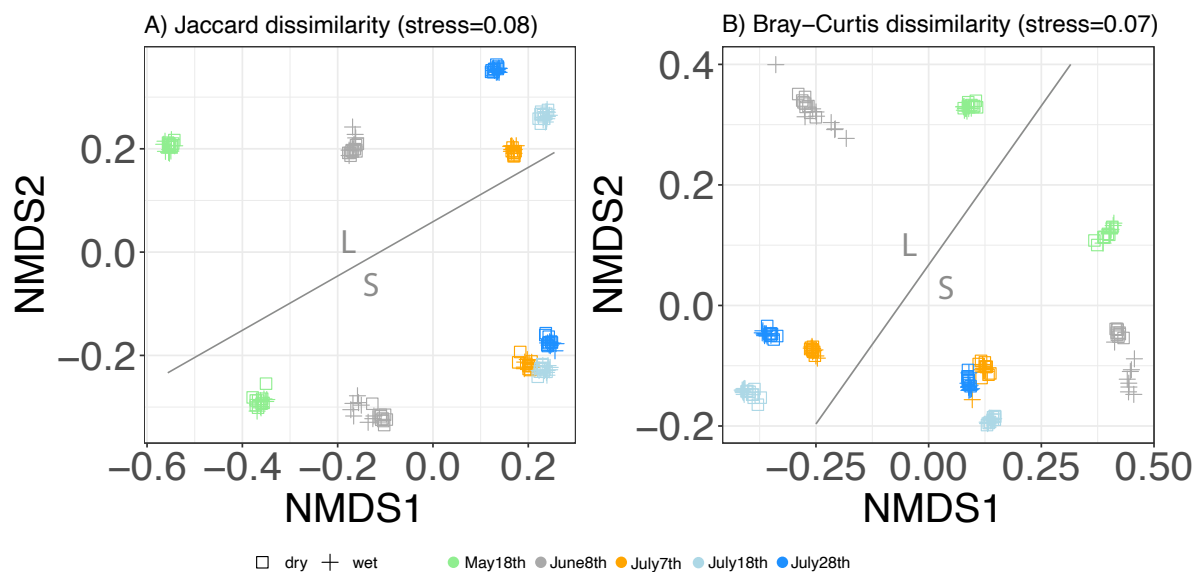

247

248 **Figure 2:** Non-metric multidimensional scaling based on A) Jaccard (presence/absence  
249 data) and B) Bray-Curtis (abundance data – regarding read numbers) dissimilarity matrices.  
250 Samples include the nine subsamples per emptying date (colour coding), size fraction (S  
251 and L, marked in figure) and condition during homogenisation (shape coding).  
252

253 For samples processed under wet condition, on average  $60.7\% \pm 8.5$  of calculated total  
254 diversity could be detected in size fraction S and  $75.8\% \pm 7.9$  in size fraction L when only  
255 one subsample was processed in extraction ( $\sim 20$  mg of tissue, Fig. 3). With nine extraction  
256 subsamples ( $9 \times \sim 20$  mg)  $88.4\% \pm 3.2$  and  $92.4\% \pm 4.2$  of calculated total richness were  
257 detected in fraction S and L respectively, while 95% of calculated species richness was  
258 assessed with  $12 \pm 5.4$  and  $17 \pm 3.4$  subsamples. For samples homogenised in wet and  
259 additional dry condition, a single extraction ( $\sim 20$  mg) of size class S revealed  $64\% \pm 2.3$  of  
260 calculated species richness, while  $79\% \pm 3.8$  could be detected in 20 mg of size class L (Fig.  
261 3). On average  $88.9\% \pm 1.6$  of total diversity was assessed with the nine applied  
262 subsamples for size fraction S and  $93.1\% \pm 3.8$  for size fraction L, while 95% of total was  
263 calculated with  $16 \pm 2.1$  (S, 320 mg) and  $13 \pm 7.1$  (L, 260 mg) subsamples ( $\sim 320$  mg and  
264  $\sim 260$  mg, Fig. 3).  
265

266 Detailed analysis of Hymenoptera in only wet homogenised tissue revealed on average  
267  $47.2\% \pm 13.3$  of extrapolated total species richness in size fraction S and  $80.4\% \pm 10.4$  in  
268 size fraction L when a single subsample was processed (Fig.3). Increased to nine  
269 subsamples,  $81.4\% \pm 7.6$  (S) and  $96.2\% \pm 4.7$  (L) of calculated total diversity were detected.  
270 Extrapolations revealed, that 95% of total calculated diversity was achieved by processing  
271  $22 \pm 5.2$  (S,  $\sim 440$  mg) and  $7.4 \pm 6$  (L,  $\sim 140$  mg) replicates. For wet and additional dry  
272 homogenisation, one extraction subsample revealed  $54\% \pm 2.7$  (S) and  $82.4\% \pm 9.6$  (L) of  
273 total species richness, while  $86.2\% \pm 3.1$  and  $95.1\% \pm 4.8$  could be assessed with nine  
274 extraction subsamples. Calculations revealed a detection of 95% from total hymenopteran  
275 species richness if  $18 \pm 4$  (360 mg) and  $9.8 \pm 8$  (200 mg) replicates were processed (Fig. 3).  
276

277 For wet homogenisation, in detail analysis of dipteran representatives revealed  $70.6\% \pm 5.6$   
278 of calculated diversity in size fraction S and  $77\% \pm 10.3$  in size fraction L, when only a single  
279 extraction subsample was processed. Detected richness increased to  $92.1\% \pm 4.7$  and  $91\%$   
280  $\pm 5.6$  when nine subsamples were processed (95% were reached with  $14.2 \pm 7.9$  and  $5 \pm 1.9$   
281 subsamples). With additional dry homogenisation processing of one tissue subsample  
282 revealed  $70.6\% \pm 2.7$  of extrapolated diversity for size fraction S and  $81.1 \pm 5.9$  for size  
283 fraction L. With nine extraction subsamples, taxa detection increased to  $91.2\% \pm 3.4$  (S) and  
284  $93.3\% \pm 5.5$  (L). Calculations revealed a detection of 95% from total Diptera if  $15.6 \pm 5.4$

285 (~320 mg) and  $14.2 \pm 10.2$  (~200 mg) replicates were processed. For detailed information  
286 about observed and calculated species richness see Figure 3.  
287

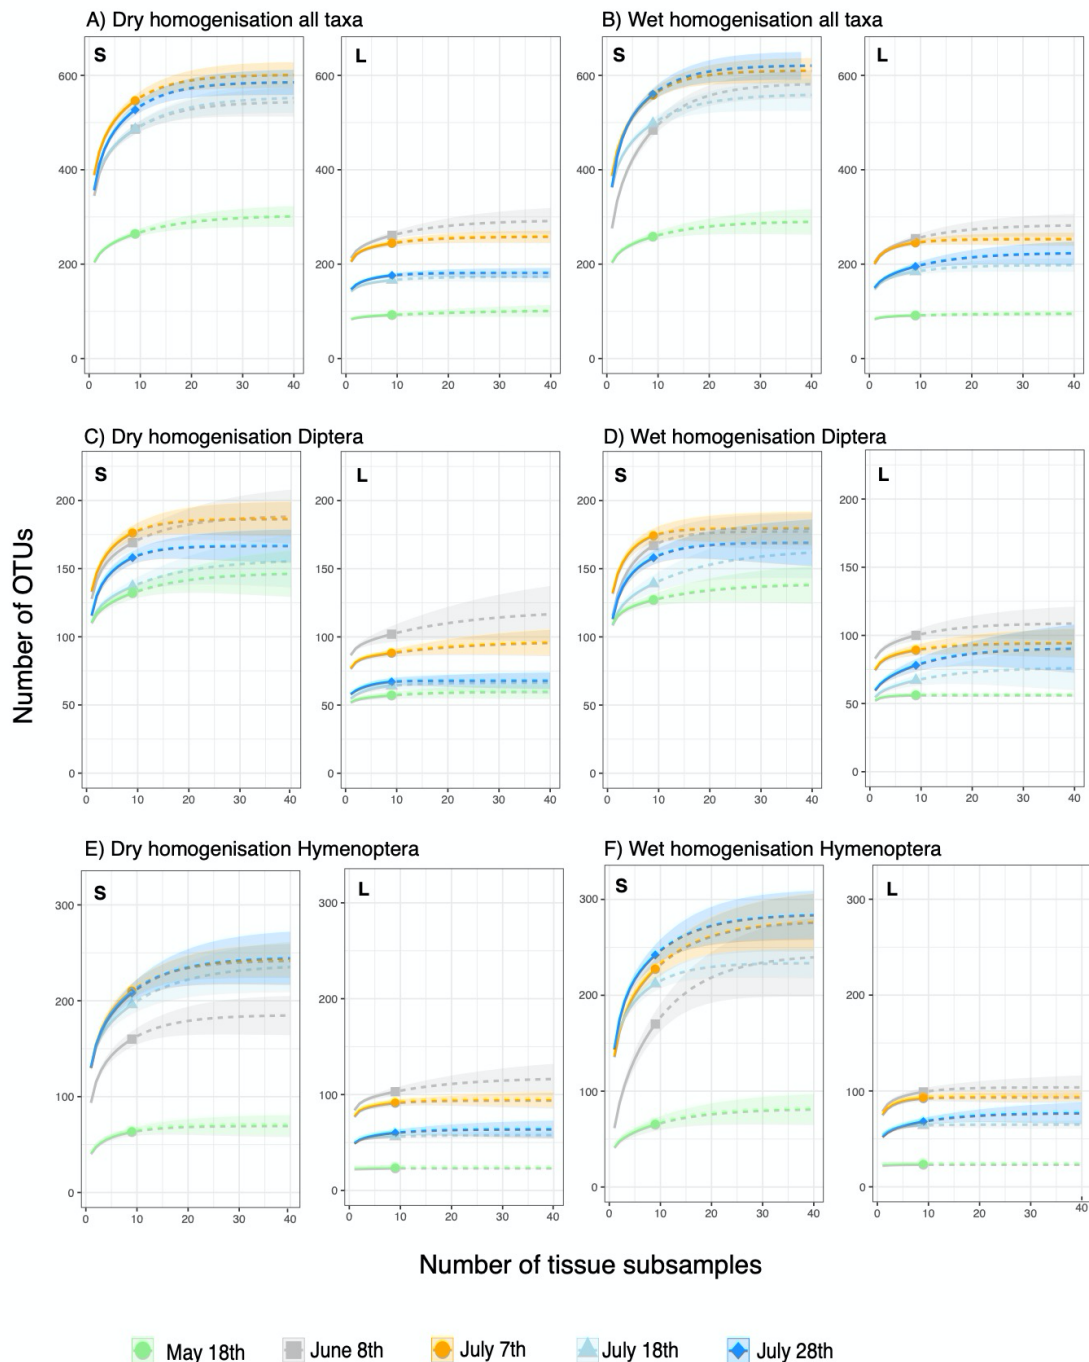

288

289 **Figure 3:** Species accumulation curves. Increased number of OTUs with increased amount  
290 of processed tissue in extraction is illustrated as well as extrapolation up to 40 subsamples.  
291 All taxa homogenized in A) dry and B) wet condition; Diptera recovered in samples  
292 homogenised in C) dry and D) wet condition; Hymenoptera detected in samples  
293 homogenised in E) dry and F) wet condition. Size fraction is marked in the upper left corner  
294 of each subfigure (S = small, L = large).  
295

296

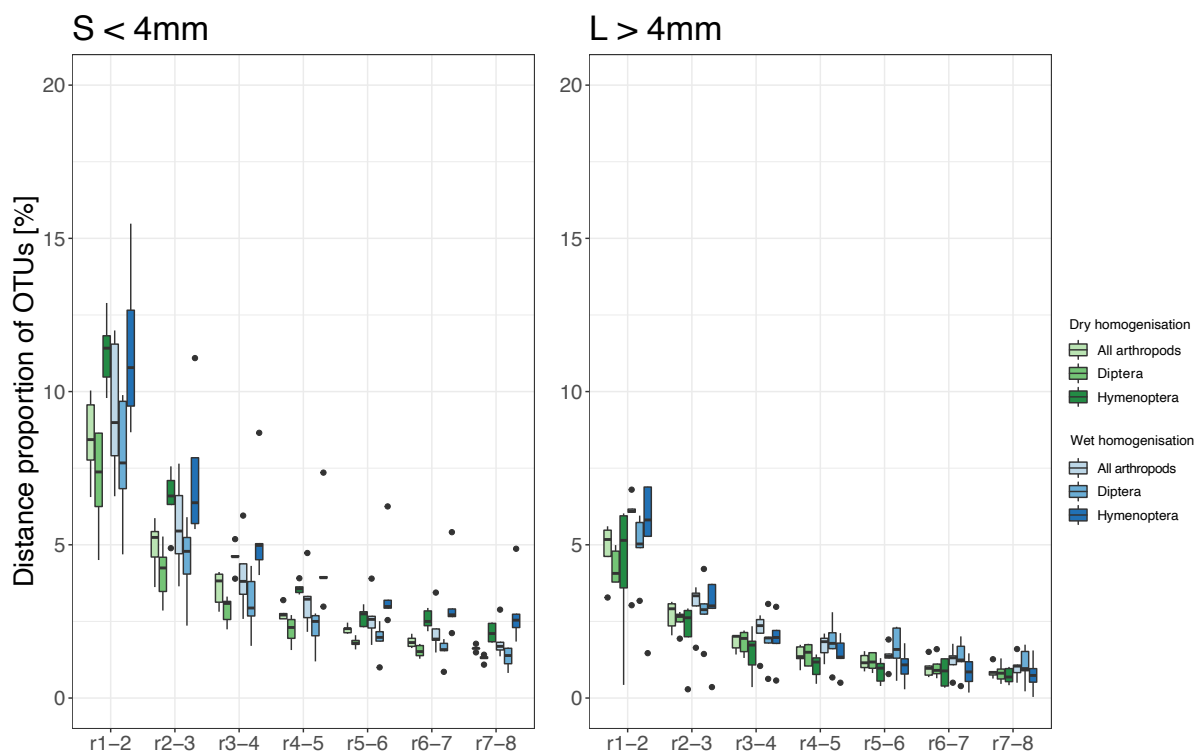

297

298 **Figure 4:** Proportion of molecular units (OTUs) detected with additional DNA extraction  
299 subsamples. A) for samples of size fraction L (> 4mm) and B) for size fraction S (< 4 mm).  
300 The x-axis describes differences between processed subsamples (e.g. r1-r2 difference in  
301 relative number of OTUs detected with one subsamples (~20 mg) compared to two  
302 subsamples (~40 mg)).

303

304

## 305 Discussion

306 Homogenisation of bulk samples and subsequent DNA extraction from destructed tissue is  
307 widely applied when insect biodiversity is assessed through DNA metabarcoding (Beermann  
308 et al., 2021; Hardulak et al., 2020; Mata et al., 2020). It is up to now more efficient for bulk  
309 sample analysis than other extraction methods (Marquina et al., 2019; Persaud et al., 2021;  
310 Zenker et al., 2020). Here we set out to test different homogenisation protocols and how  
311 subsampling of homogenised tissue affects diversity estimates of highly diverse Malaise trap  
312 samples.

313

### 314 Comparison of different homogenisation approaches

315 The average dissimilarity between reactions homogenised under dry conditions was lower  
316 than dissimilarity between reactions processed under wet condition for presence/absence  
317 analysis, which indicates a higher homogeneity of tissue samples processed under dry  
318 condition. To ensure comparability and processing of identical sampling material (as stated

319 in Material and Methods section line 150-156), the dry homogenisation approach was based  
320 on material already destructed under wet condition. This additional step of 3 min  
321 homogenisation most probably influenced refinement of samples and similarity of  
322 subsamples. In addition, on average a lower tissue weight was processed subsequent to wet  
323 homogenisation due to a weight decrease after drying (difference 3 mg). However, Jaccard's  
324 dissimilarity indices of subsamples which were homogenised in wet condition was on  
325 average  $0.21 \pm 0.08$ , mainly due to high inconsistencies between subsamples from June 8<sup>th</sup>  
326 with an average dissimilarity of  $0.35 \pm 0.02$  compared to dissimilarities between subsamples  
327 of the other collection dates ( $0.18 \pm 0.06$ ; Fig. 2). The homogenisation of dried samples  
328 implements drying for approximately 48 h at temperatures around 50 °C to guarantee the  
329 complete evaporation of ethanol from the sample. In addition, the fine powder resulting from  
330 dry homogenisation is electrostatically charged and thus bears a high risk of cross  
331 contamination between samples and general lab contamination, and further increases the  
332 time for sample handling (Buchner et al., 2021; Elbrecht and Steinke, 2019). In comparison,  
333 the homogenisation of wet samples soaked in ethanol circumvents the drying step and is  
334 therefore more time efficient and suitable for large scale approaches as implemented in  
335 several studies on aquatic samples (Hajibabaei et al., 2019; Majaneva et al., 2018; Pereira-  
336 da-Conceicao et al., 2020). In addition, the handling of homogenised tissue in ethanol is  
337 simplified and reduces contamination risk (Elbrecht and Steinke, 2019). The minor  
338 differences we observed between the two applied methods and the above-mentioned  
339 experimental setup allows to recommend homogenisation of wet material for tissue-based  
340 DNA metabarcoding Malaise trap samples as it reduces processing time and contamination  
341 risk. Additionally, results indicate, that an additional homogenisation step of dried material as  
342 e.g. through bead-grinding should be integrated after material has been subsampled to  
343 increase the fineness of material as also conducted in Buchner et al., 2021.

344

#### 345 Amount of tissue needed for homogenisation

346 A high, but incomplete proportion of the total insect diversity was assessed when processing  
347 a single tissue subsample in extraction, which opens up an additional perspective to  
348 previous studies highlighting wet homogenisation of samples (Buchner et al., 2021). This  
349 accounts for both tested variables, basis material for homogenisation (wet or dry) and size  
350 fractions (Fig. 3). For all samples at least 60% of calculated total arthropod diversity were  
351 detected with a single extraction from ~20 mg of tissue (Fig. 3 A+B), revealing strong  
352 alterations between size fractions time intervals and higher insect taxa. The processing of  
353 additional subsamples only moderately increase diversity estimates for size fraction L and  
354 samples of both size fractions from samples collected in May. While those samples  
355 constitute a comparatively low biodiversity, a strong increase was detected for remaining

356 samples of the small size fractions and collected in summer. Results indicate that extraction  
357 should be conducted from more tissue for highly diverse samples, either through increasing  
358 number of extraction subsamples, as it was also recommended in (Elbrecht and Steinke,  
359 2019) or a higher tissue volume per DNA extraction. Additional rare material for extraction  
360 however comes with higher expenses but can increase taxa detection by 25-30% as an  
361 average over all taxa. Referring to the 3000 BINs detected within a year-long Malaise trap  
362 collection through single-specimen barcoding in Geiger et al., 2016 this can result in 600-900  
363 additional molecular units for year-long application of a malaise trap.

364

365 The most pronounced increase of OTUs with additional extraction subsamples was  
366 observed for representatives of the order Hymenoptera, which is almost twice as high as for  
367 Diptera (Fig. 3, Tab. 2). Representatives of these two orders are the main targets in many  
368 Malaise trapping studies (Ssymank et al., 2018). However, as also indicated with previous  
369 studies, dipterans are present in much higher individual numbers, constituting a higher  
370 proportion of biomass in Malaise trap catches in Germany, while diversity of both groups are  
371 considered to be similar (Geiger et al., 2016). An underrepresentation of specific insect  
372 families, especially constituting taxa of low-biomass (Elbrecht et al., 2021) has been reported  
373 from previous metabarcoding studies (Elbrecht and Steinke, 2019; Krehenwinkel et al.,  
374 2017; Yu et al., 2012). This accounts e.g. for highly diverse parasitoid hymenopterans, which  
375 depict important ecosystem functions. While insufficient primer binding efficiency is  
376 discussed as the main reason for this phenomenon, our results indicate, that the extraction  
377 from an insufficient amount of raw tissue material could also bias detected diversity pattern.  
378 It also assumes that taxon biomass in complex bulk samples is affecting detection probability  
379 if a limited amount of tissue is processed in extraction but can be increased through insertion  
380 of higher tissue amounts. Again, this accounts especially for highly diverse samples as  
381 indicated here through the small size fraction. We demonstrate, that the use of higher  
382 amount of tissue of approx. 180 mg over nine subsamples increase the detection of low  
383 biomass taxa, even if general sequence coverage remains low (5% of reads assigned to  
384 Hymenoptera, Table 1). Additionally, the application of higher sequencing depth can  
385 increase taxa recovery and overlap between extraction subsamples. We here only tested a  
386 sequencing depth of on average  $114,394 \pm 20,365$  reads per sample (after quality filtering)  
387 and detailed analysis to understand the linkage between higher sequencing depth and  
388 replication strategy is out of the scope of the present study. Further investigation could  
389 reveal an increase in sequencing depth as the most effective way to optimise taxon recovery  
390 under financial constraints.

391

## 392 **Conclusion**

393 We recommend homogenisation of wet material in tissue-based DNA metabarcoding of  
394 Malaise trap samples due to similar levels of taxon recovery from dry and wet tissue  
395 homogenisation combined with a lower time effort and contamination susceptibility of the  
396 latter approach. In both, dry and wet homogenisation, additional DNA extractions from more  
397 tissue results in a higher number of detected taxa, in particular those of low biomass. The  
398 amount of processed tissue and number of subsamples affects the resolution taxo-  
399 specifically. A decision on the more complete diversity detection associated with higher  
400 resources depends on the focused scientific goals of individual studies.

401

## 402 **Data Accessibility**

403 The raw sequence used in this study is available at NCBI SRA: XX

404

## 405 **Competing Interests**

406 The authors declare no competing interests

407

## 408 **Acknowledgements**

409 This work was supported by the Ministry for Environment, Agriculture, Conservation and  
410 Consumer Protection of the German State of North Rhine-Westphalia (No. III-1-620.08)

411

## 412 **References**

413

- 414 Andrews, S., Krueger, F., Segonds-Pichon, A., Biggins, L., Krueger, C., Wingett, S., 2012.  
415 FastQC. Babraham, UK.
- 416 Andújar, C., Creedy, T.J., Arribas, P., López, H., Salces-Castellano, A., Pérez-Delgado, A.,  
417 Vogler, A.P., Emerson, B.C., 2020. Validated removal of nuclear pseudogenes and  
418 sequencing artefacts from mitochondrial metabarcode data. bioRxiv  
419 2020.06.17.157347. <https://doi.org/10.1101/2020.06.17.157347>
- 420 Arribas, P., Andújar, C., Bidartondo, M.I., Bohmann, K., Coissac, É., Creer, S., deWaard,  
421 J.R., Elbrecht, V., Ficetola, G.F., Goberna, M., Kennedy, S., Krehenwinkel, H.,  
422 Leese, F., Novotny, V., Ronquist, F., Yu, D.W., Zinger, L., Creedy, T.J.,  
423 Meramveliotakis, E., Noguerales, V., Overcast, I., Morlon, H., Vogler, A.P.,  
424 Papadopoulou, A., Emerson, B.C., 2021. Connecting high-throughput biodiversity  
425 inventories: Opportunities for a site-based genomic framework for global integration  
426 and synthesis. *Mol. Ecol.* 30, 1120–1135. <https://doi.org/10.1111/mec.15797>
- 427 Batovska, J., Lynch, S.E., Cogan, N.O.I., Brown, K., Darbro, J.M., Kho, E.A., Blackett, M.J.,  
428 2018. Effective mosquito and arbovirus surveillance using metabarcoding. *Mol. Ecol.*  
429 *Resour.* 18, 32–40. <https://doi.org/10.1111/1755-0998.12682>
- 430 Batovska, J., Piper, A., Valenzuela, 2021. Developing a Non-destructive Metabarcoding  
431 Protocol for Detection of Pest Insects in Bulk Trap Catches.
- 432 Beentjes, K.K., Speksnijder, A.G.C.L., Schilthuizen, M., Hoogeveen, M., Pastoor, R., van der  
433 Hoorn, B.B., 2019. Increased performance of DNA metabarcoding of

- 434 macroinvertebrates by taxonomic sorting. PLOS ONE 14, e0226527.  
435 <https://doi.org/10.1371/journal.pone.0226527>
- 436 Boyer, F., Mercier, C., Bonin, A., Le Bras, Y., Taberlet, P., Coissac, E., 2016. obitools: a  
437 unix-inspired software package for DNA metabarcoding. Mol. Ecol. Resour. 16, 176–  
438 182. <https://doi.org/10.1111/1755-0998.12428>
- 439 Buchner, D., Beermann, A.J., Laini, A., Rolauffs, P., Vitecek, S., Hering, D., Leese, F., 2019.  
440 Analysis of 13,312 benthic invertebrate samples from German streams reveals minor  
441 deviations in ecological status class between abundance and presence/absence  
442 data. PLOS ONE 14, e0226547. <https://doi.org/10.1371/journal.pone.0226547>
- 443 Buchner, D., Leese, F., 2020. BOLDigger – a Python package to identify and organise  
444 sequences with the Barcode of Life Data systems. Metabarcoding Metagenomics 4,  
445 e53535. <https://doi.org/10.3897/mbmg.4.53535>
- 446 Bush, A., Compson, Z.G., Monk, W.A., Porter, T.M., Steeves, R., Emilson, E., Gagne, N.,  
447 Hajibabaei, M., Roy, M., Baird, D.J., 2019. Studying Ecosystems With DNA  
448 Metabarcoding: Lessons From Biomonitoring of Aquatic Macroinvertebrates. Front.  
449 Ecol. Evol. 7, 434. <https://doi.org/10.3389/fevo.2019.00434>
- 450 Bush, A., Monk, W.A., Compson, Z.G., Peters, D.L., Porter, T.M., Shokralla, S., Wright,  
451 M.T.G., Hajibabaei, M., Baird, D.J., 2020. DNA metabarcoding reveals  
452 metacommunity dynamics in a threatened boreal wetland wilderness. Proc. Natl.  
453 Acad. Sci. 117, 8539. <https://doi.org/10.1073/pnas.1918741117>
- 454 Cordier, T., Forster, D., Dufresne, Y., Martins, C.I.M., Stoeck, T., Pawlowski, J., 2018.  
455 Supervised machine learning outperforms taxonomy-based environmental DNA  
456 metabarcoding applied to biomonitoring. Mol. Ecol. Resour. 18, 1381–1391.  
457 <https://doi.org/10.1111/1755-0998.12926>
- 458 Elbrecht, V., Braukmann, T.W.A., Ivanova, N.V., Prosser, S.W.J., Hajibabaei, M., Wright, M.,  
459 Zakharov, E.V., Hebert, P.D.N., Steinke, D., 2019. Validation of COI metabarcoding  
460 primers for terrestrial arthropods. PeerJ 7, e7745. <https://doi.org/10.7717/peerj.7745>
- 461 Elbrecht, V., Vamos, E.E., Meissner, K., Aroviita, J., Leese, F., 2017. Assessing strengths  
462 and weaknesses of DNA metabarcoding-based macroinvertebrate identification for  
463 routine stream monitoring. Methods Ecol. Evol. 8, 1265–1275.  
464 <https://doi.org/10.1111/2041-210X.12789>
- 465 Evans, D.M., Kitson, J.J.N., Lunt, D.H., Straw, N.A., Pocock, M.J.O., 2016. Merging DNA  
466 metabarcoding and ecological network analysis to understand and build resilient  
467 terrestrial ecosystems. Funct. Ecol. 30, 1904–1916. <https://doi.org/10.1111/1365-2435.12659>
- 469 Frøslev, T.G., Kjøller, R., Bruun, H.H., Ejrnæs, R., Brunbjerg, A.K., Pietroni, C., Hansen,  
470 A.J., 2017. Algorithm for post-clustering curation of DNA amplicon data yields reliable  
471 biodiversity estimates. Nat. Commun. 8, 1188. <https://doi.org/10.1038/s41467-017-01312-x>
- 472
- 473 Giebner, H., Langen, K., Bourlat, S.J., Kukowka, S., Mayer, C., Astrin, J.J., Misof, B.,  
474 Fonseca, V.G., 2020. Comparing diversity levels in environmental samples: DNA  
475 sequence capture and metabarcoding approaches using 18S and COI genes. Mol.  
476 Ecol. Resour. 20, 1333–1345. <https://doi.org/10.1111/1755-0998.13201>
- 477 Geiger, M. F., Moriniere, J., Hausmann, A., Haszprunar, G., Wägele, W., Hebert, P. D., &  
478 Rulik, B. (2016). Testing the Global Malaise Trap Program—How well does the  
479 current barcode reference library identify flying insects in Germany?. Biodiversity  
480 data journal, (4).
- 481 Gleason, J.E., Elbrecht, V., Braukmann, T.W.A., Hanner, R.H., Cottenie, K., 2020.  
482 Assessment of stream macroinvertebrate communities with eDNA is not congruent  
483 with tissue-based metabarcoding. Mol. Ecol. n/a. <https://doi.org/10.1111/mec.15597>
- 484 Hajibabaei, M., Spall, J.L., Shokralla, S., van Konyenburg, S., 2012. Assessing biodiversity  
485 of a freshwater benthic macroinvertebrate community through non-destructive  
486 environmental barcoding of DNA from preservative ethanol. BMC Ecol. 12, 28.  
487 <https://doi.org/10.1186/1472-6785-12-28>



- 488 Hardulak, L.A., Moriniere, J., Hausmann, A., Hendrich, L., Schmidt, S., Doczkal, D., Müller,  
489 J., Hebert, P.D., Haszprunar, G., 2020. DNA metabarcoding for biodiversity  
490 monitoring in a national park: Screening for invasive and pest species. *Mol. Ecol.*  
491 *Resour.* 1–16. <https://doi.org/10.1111/1755-0998.13212>
- 492 Hausmann, A., Seegerer, A.H., Greifenstein, T., Knubben, J., Morinière, J., Bozicevic, V.,  
493 Doczkal, D., Günter, A., Ulrich, W., Habel, J.C., 2020. Toward a standardized  
494 quantitative and qualitative insect monitoring scheme. *Ecol. Evol.* 10, 4009–4020.  
495 <https://doi.org/10.1002/ece3.6166>
- 496 Ji, Y., Ashton, L., Pedley, S.M., Edwards, D.P., Tang, Y., Nakamura, A., Kitching, R.,  
497 Dolman, P.M., Woodcock, P., Edwards, F.A., Larsen, T.H., Hsu, W.W., Benedick, S.,  
498 Hamer, K.C., Wilcove, D.S., Bruce, C., Wang, X., Levi, T., Lott, M., Emerson, B.C.,  
499 Yu, D.W., 2013. Reliable, verifiable and efficient monitoring of biodiversity via  
500 metabarcoding. *Ecol. Lett.* 16, 1245–1257. <https://doi.org/10.1111/ele.12162>
- 501 Kirse, A., Bourlat, S.J., Lange, K., Fonseca, V.G., n.d. Arthropod diversity assessment from  
502 the ground up: Seasonal overlap between soil and Malaise traps. *Rev.*
- 503 Mächler, E., Walser, J.-C., Altermatt, F., 2020. Decision-making and best practices for  
504 taxonomy-free environmental DNA metabarcoding in biomonitoring using Hill  
505 numbers. *Mol. Ecol.* n/a. <https://doi.org/10.1111/mec.15725>
- 506 Majaneva, M., Diserud, O.H., Eagle, S.H.C., Hajibabaei, M., Ekrem, T., 2018. Choice of DNA  
507 extraction method affects DNA metabarcoding of unsorted invertebrate bulk samples.  
508 *Metabarcoding Metagenomics* 2, e26664. <https://doi.org/10.3897/mbmg.2.26664>
- 509 Marquina, D., Esparza-Salas, R., Roslin, T., Ronquist, F., 2019. Establishing arthropod  
510 community composition using metabarcoding: Surprising inconsistencies between  
511 soil samples and preservative ethanol and homogenate from Malaise trap catches.  
512 *Mol. Ecol. Resour.* 19, 1516–1530. <https://doi.org/10.1111/1755-0998.13071>
- 513 Martin, M., 2011. Cutadapt removes adapter sequences from high-throughput sequencing  
514 reads. *EMBnetjournal* Vol 17 No 1 *Gener. Seq. Data Anal.*  
515 <https://doi.org/10.14806/ej.17.1.200>
- 516 Martins, F.M.S., Galhardo, M., Filipe, A.F., Teixeira, A., Pinheiro, P., Paupério, J., Alves,  
517 P.C., Beja, P., 2019. Have the cake and eat it: Optimizing nondestructive DNA  
518 metabarcoding of macroinvertebrate samples for freshwater biomonitoring. *Mol. Ecol.*  
519 *Resour.* 19, 863–876. <https://doi.org/10.1111/1755-0998.13012>
- 520 Martoni, F., Nogarotto, E., Piper, A.M., Mann, R., Valenzuela, I., Eow, L., Rako, L., Rodoni,  
521 B.C., Blacket, M.J., 2021. Propylene Glycol and Non-Destructive DNA Extractions  
522 Enable Preservation and Isolation of Insect and Hosted Bacterial DNA. *Agriculture*  
523 11. <https://doi.org/10.3390/agriculture11010077>
- 524 Mata, V.A., Ferreira, S., Campos, R.M., da Silva, L.P., Veríssimo, J., Corley, M.F.V., Beja,  
525 P., 2020. Efficient assessment of nocturnal flying insect communities by combining  
526 automatic light traps and DNA metabarcoding. *Environ. DNA* n/a.  
527 <https://doi.org/10.1002/edn3.125>
- 528 McGee, K.M., Robinson, C.V., Hajibabaei, M., 2019. Gaps in DNA-Based Biomonitoring  
529 Across the Globe. *Front. Ecol. Evol.* 7, 337. <https://doi.org/10.3389/fevo.2019.00337>
- 530 Morinière, J., Balke, M., Doczkal, D., Geiger, M.F., Hardulak, L.A., Haszprunar, G.,  
531 Hausmann, A., Hendrich, L., Regalado, L., Rulik, B., Schmidt, S., Wägele, J.-W.,  
532 Hebert, P.D.N., 2019. A DNA barcode library for 5,200 German flies and midges  
533 (Insecta: Diptera) and its implications for metabarcoding-based biomonitoring. *Mol.*  
534 *Ecol. Resour.* 19, 900–928. <https://doi.org/10.1111/1755-0998.13022>
- 535 Oksanen, J., Blanchet, F.G., Friendl, M., Kindt, R., Legendre, P., McGlinn, D., Minchin, P.R.,  
536 O’Hara, R.B., Simpson, G.L., Solymos, P., Stevens, M.H.H., Szoecs, E., Wagner, H.,  
537 2019. *Vegan: community ecology package*.
- 538 Pawlowski, J., Kelly-Quinn, M., Altermatt, F., Apothéoz-Perret-Gentil, L., Beja, P., Boggero,  
539 A., Borja, A., Bouchez, A., Cordier, T., Domaizon, I., Feio, M.J., Filipe, A.F.,  
540 Fornaroli, R., Graf, W., Herder, J., van der Hoorn, B., Iwan Jones, J., Sagova-  
541 Mareckova, M., Moritz, C., Barquín, J., Piggott, J.J., Pinna, M., Rimet, F., Rinkevich,  
542 B., Sousa-Santos, C., Specchia, V., Trobajo, R., Vasselon, V., Vitecek, S.,

- 543 Zimmerman, J., Weigand, A., Leese, F., Kahlert, M., 2018. The future of biotic  
544 indices in the ecogenomic era: Integrating (e)DNA metabarcoding in biological  
545 assessment of aquatic ecosystems. *Sci. Total Environ.* 637–638, 1295–1310.  
546 <https://doi.org/10.1016/j.scitotenv.2018.05.002>
- 547 Pedro, P.M., Rodrigues de Sá, I.L., Rojas, M.V.R., Amorim, J.A., Ribeiro Galardo, A.K.,  
548 Santos Neto, N.F., Furtado, N.V.R., Pires de Carvalho, D., Nabas Ribeiro, K.A., de  
549 Paiva, M., Pepe Razzolini, M.T., Sallum, M.A.M., 2020. Efficient Monitoring of Adult  
550 and Immature Mosquitoes Through Metabarcoding of Bulk Samples: A Case Study  
551 for Non-Model Culicids With Unique Ecologies. *J. Med. Entomol.*  
552 <https://doi.org/10.1093/jme/tjaa267>
- 553 Pereira-da-Conceicao, L., Elbrecht, V., Hall, A., Briscoe, A., Barber-James, H., Price, B.,  
554 2020. Metabarcoding unsorted kick-samples facilitates macroinvertebrate-based  
555 biomonitoring with increased taxonomic resolution, while outperforming  
556 environmental DNA. *Environ. DNA* n/a. <https://doi.org/10.1002/edn3.116>
- 557 Persaud, S.F., Cottenie, K., Gleason, J.E., 2021. Ethanol eDNA Reveals Unique Community  
558 Composition of Aquatic Macroinvertebrates Compared to Bulk Tissue Metabarcoding  
559 in a Biomonitoring Sampling Scheme. *Diversity* 13, 34.
- 560 Piñol, J., Senar, M.A., Symondson, W.O.C., 2019. The choice of universal primers and the  
561 characteristics of the species mixture determine when DNA metabarcoding can be  
562 quantitative. *Mol. Ecol.* 28, 407–419. <https://doi.org/10.1111/mec.14776>
- 563 Porter, T.M., Hajibabaei, M., 2020. Putting COI Metabarcoding in Context: The Utility of  
564 Exact Sequence Variants (ESVs) in Biodiversity Analysis. *Front. Ecol. Evol.* 8, 248.  
565 <https://doi.org/10.3389/fevo.2020.00248>
- 566 Porter, T.M., Morris, D.M., Basiliko, N., Hajibabaei, M., Doucet, D., Bowman, S., Emilson,  
567 E.J.S., Emilson, C.E., Chartrand, D., Wainio-Keizer, K., Séguin, A., Venier, L., 2019.  
568 Variations in terrestrial arthropod DNA metabarcoding methods recovers robust beta  
569 diversity but variable richness and site indicators. *Sci. Rep.* 9, 18218.  
570 <https://doi.org/10.1038/s41598-019-54532-0>
- 571 R Core Team, 2017. R: A language and environment for statistical computing.
- 572 Rognes, T., Flouri, T., Nichols, B., Quince, C., Mahé, F., 2016. VSEARCH: a versatile open  
573 source tool for metagenomics. *PeerJ* 4, e2584. <https://doi.org/10.7717/peerj.2584>
- 574 Ssymank, A., Sorg, M., Doczkal, D., Rulik, B., Merkel-Wallner, G., Vischer-Leopold, M.,  
575 2018. Praktische Hinweise und Empfehlungen zur Anwendung von Malaisefallen für  
576 Insekten in der Biodiversitätserfassung und im Monitoring. *Ser. Nat.* 1, 1–12.
- 577 Steinke, D., Braukmann, T., Manerus, L., Woodhouse, A., Elbrecht, V., 2020. Effects of  
578 Malaise trap spacing on species richness and composition of terrestrial arthropod  
579 bulk samples. *bioRxiv* 2020.09.30.321430.  
580 <https://doi.org/10.1101/2020.09.30.321430>
- 581 Turon, X., Antich, A., Palacín, C., Præbel, K., Wangensteen, O.S., 2020. From  
582 metabarcoding to metaphylogeography: separating the wheat from the chaff. *Ecol.*  
583 *Appl.* 30, e02036. <https://doi.org/10.1002/eap.2036>
- 584 Vamos, E.E., Elbrecht, V., Leese, F., 2017. Short COI markers for freshwater  
585 macroinvertebrate metabarcoding. *Metabarcoding Metagenomics* 1, e14625.  
586 <https://doi.org/10.3897/mbmg.1.14625>
- 587 van der Heyde, M., Bunce, M., Wardell-Johnson, G., Fernandes, K., White, N.E., Nevill, P.,  
588 2020. Testing multiple substrates for terrestrial biodiversity monitoring using  
589 environmental DNA metabarcoding. *Mol. Ecol. Resour.* 20, 732–745.  
590 <https://doi.org/10.1111/1755-0998.13148>
- 591 Wickham, H., 2016. *ggplot2: Elegant Graphics for Data Analysis*. Springer-Verlag New York.
- 592 Wickham, H., Francois, R., Henry, L., Müller, K., 2021. *dplyr: A Grammar of Data*  
593 *Manipulation*.
- 594 Yu, D.W., Ji, Y., Emerson, B.C., Wang, X., Ye, C., Yang, C., Ding, Z., 2012. Biodiversity  
595 soup: metabarcoding of arthropods for rapid biodiversity assessment and  
596 biomonitoring. *Methods Ecol. Evol.* 3, 613–623. <https://doi.org/10.1111/j.2041-210X.2012.00198.x>
- 597

598 Zenker, M.M., Specht, A., Fonseca, V.G., 2020. Assessing insect biodiversity with automatic  
599 light traps in Brazil: Pearls and pitfalls of metabarcoding samples in preservative  
600 ethanol. *Ecol. Evol.* 10, 2352–2366. <https://doi.org/10.1002/ece3.6042>  
601 Zizka, V.M., Leese, F., Peinert, B., Geiger Matthias F, 2019. DNA metabarcoding from  
602 sample fixative as a quick and voucher-preserving biodiversity assessment method.  
603 *Genome* 62, 122–136. <https://doi.org/doi:10.1139/gen-2018-0048>  
604 Zizka, V.M.A., Elbrecht, V., Macher, J.-N., Leese, F., 2019. Assessing the influence of  
605 sample tagging and library preparation on DNA metabarcoding. *Mol. Ecol. Resour.*  
606 19, 893–899. <https://doi.org/10.1111/1755-0998.13018>  
607 Zizka, V.M.A., Geiger, M.F., Leese, F., 2020. DNA metabarcoding of stream invertebrates  
608 reveals spatio-temporal variation but consistent status class assessments in a natural  
609 and urban river. *Ecol. Indic.* 115, 106383.  
610 <https://doi.org/10.1016/j.ecolind.2020.106383>  
611  
612  
613
